# Supplementary material
Source: PubMed Central journal article supplement (PMC4317373)

### Conflict of Interest Statement

Each of the undersigned co-authors to the manuscript entitled "First-in-Man Demonstration of a Fully Implanted Myoelectric Sensors System to Control an Advanced Electromechanical Prosthetic Hand" submitted for publication in the **Journal for Neuroscience Methods** asserts the following individually on behalf of himself or herself:

1. I am employed by the Alfred Mann Foundation for Scientific Research (AMF), a not-for-profit corporation which has been developing the IMES devices integral to the operation of the prosthetic hand and the clinical study that is the subject of this reported research. Further, AMF has funded, in part, the research, development and clinical study reported in this manuscript and owns all rights to commercialize the IMES System. As part of our employment, we have assigned intellectual property to AMF and in some cases patent applications have been filed and patents have issued.
2. I do not have any direct or indirect ownership in the IMES system, or any financial interest in any of the work product described in this manuscript or any of the aforementioned intellectual property.
3. I do not have any direct or indirect conflicts of interest resulting from my employment, personal relationships, academic competition or personal bias that have influenced my honest and open reporting of the study results contained in this manuscript.
4. I have read and approve the contents of the submitted manuscript.
5. To the best of my knowledge, all the work described in the manuscript has been conducted pursuant to approvals from all relevant bodies and regulatory agencies as required by applicable laws and regulations.

Date: 5/22/14

Signed:

David Hankin 

Melissa Evangelista 

Morten Hansen 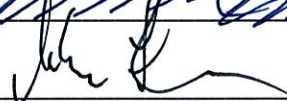

Joseph Lockhart 

Supplement: NIHMS619257-supplement-02.pdf [file NIHMS619257-supplement-02.pdf]
